# Supplementary material
Source: publisher site journal article supplement (https://static.cambridge.org/content/id/urn:cambridge.org:id:article:S0007114519001946/resource/name/S0007114519001946supp002.xlsx)
Supplement: Supplementary file 1 [file S0007114519001946supp002.xlsx]

## Sheet: Sheet1
Supplementary Table 2. Proximate and fatty acid compositions of whole fish afiter feeding the diets for
22 weeks (154 days) from first feeding. Total saturated fatty acids includes 15:0, 20:0, 22:0 and 24:0
present in some samples at up to 0.4%. Total monenes contains 16:1n-7, 20:1n-7, 20:1n-11, 22:1n-9
and 24:1n-9 present in some samples at up to 0.6%.
	REF				DIET A				DIET B				DIET C
Proximate composition (% of wet weight)
Lipid	11.7775	±	0.444925		10.4325	±	0.147281		8.9475	±	1.03455		8.865	±	0.818311
Protein	15.28	±	0.252058		14.29	±	0.453505		15.4175	±	0.330492		14.9575	±	0.547076
Ash	2.0975	±	0.0718215		2.2225	±	0.101776		2.065	±	0.208247		2.27	±	0.0637704
Moisture	68.85	±	0.555578		70.465	±	0.349714		70.6725	±	0.694712		71.285	±	0.547144
Fatty acid composition (% of total fatty acids)
14:00:00	4.59918	±	0.0630952		0.345057	±	0.0228129		0.357182	±	0.0202351		0.362221	±	0.0359782
16:00:00	14.7404	±	0.366507		9.5635	±	0.230461		10.0498	±	0.28403		10.5833	±	0.321115
18:00:00	3.51314	±	0.129034		5.20888	±	0.0600709		5.4916	±	0.190146		5.31779	±	0.221971
Total saturated	23.5186	±	0.533561		15.4455	±	0.226555		16.3443	±	0.442225		16.865	±	0.557339
16:1n-7	4.9	±	0.0646382		0.5	±	0.0189298		0.4	±	0.0458038		0.4	±	0.0363138
18:1n-9	21.7044	±	0.405943		21.1928	±	0.296872		22.2496	±	0.358047		24.227	±	0.337379
18:1n-7	3.01989	±	0.0239257		0.92605	±	0.00663338		0.900544	±	0.00965557		0.836448	±	0.0667391
20:1n-9	5.95652	±	0.093662		0.506799	±	0.0248484		0.573788	±	0.0406266		0.662997	±	0.0533447
22:1n-11	6.89716	±	0.224009		0	±	0		0	±	0		0	±	0
Total monoenes	44.8854	±	0.445022		23.4897	±	0.25118		24.5459	±	0.383891		26.4821	±	0.359747
18:2n-6	7.20152	±	0.0686298		15.2755	±	0.156882		23.4955	±	0.371598		32.2072	±	0.253281
18:3n-6	0.184501	±	0.00294844		0.869741	±	0.088071		1.66818	±	0.0713054		3.27034	±	0.228928
20:2n-6	0.626849	±	0.0224209		0.652812	±	0.0489297		1.10593	±	0.0504927		1.59279	±	0.0929666
20:3n-6	0.23986	±	0.0120669		0.841325	±	0.0177679		1.5767	±	0.0544629		2.71703	±	0.0709722
20:4n-6	0.456538	±	0.0207315		0.243059	±	0.0297122		0.591487	±	0.0265875		1.43144	±	0.0641354
22:4n-6	0.0249881	±	0.0289148		0	±	0		0.0344079	±	0.0251954		0.102693	±	0.0702833
22:5n-6	0.159036	±	0.00813697		0	±	0		0.04863	±	0.032672		0.364025	±	0.0203997
Total n-6 PUFA	8.89329	±	0.137544		17.8825	±	0.0754063		28.5208	±	0.455535		41.6855	±	0.472659
18:3n-3	1.95627	±	0.00839146		25.0327	±	0.436081		17.144	±	0.195389		7.12215	±	0.103833
18:4n-3	1.49715	±	0.0233999		7.98154	±	0.441484		5.57043	±	0.187503		3.27067	±	0.154635
20:3n-3	0.1906	±	0.00500847		1.20291	±	0.116071		0.783402	±	0.0428794		0.276963	±	0.0341113
20:4n-3	0.884611	±	0.0225793		2.30902	±	0.107904		1.52491	±	0.108555		0.584109	±	0.0230196
20:5n-3	3.64234	±	0.14238		1.66115	±	0.0643297		1.15175	±	0.0211302		0.545714	±	0.0330084
21:5n-3	0.325292	±	0.00773176		0	±	0		0	±	0		0	±	0
22:5n-3	1.55819	±	0.0770072		0.604704	±	0.0715749		0.49341	±	0.0388569		0.259432	±	0.0393191
22:6n-3	11.7387	±	0.501993		4.39027	±	0.161967		3.92105	±	0.138689		2.90842	±	0.281583
Total n-3 PUFA	21.7932	±	0.760908		43.1823	±	0.245626		30.589	±	0.382493		14.9675	±	0.49619
C16 PUFA	0.909547	±	0.0248079		0	±	0		0	±	0		0	±	0
Total PUFA	31.596	±	0.914191		61.0647	±	0.210363		59.1098	±	0.7612		56.6529	±	0.872542
n-3/n-6	2.44996		0.0483641		2.41484		0.0212943		1.07262		0.0132359		0.359028		0.00996007
Fatty acid composition (mg/100g fish)
14:00:00	444.956	±	37.587		30.4061	±	1.86208		28.1484	±	4.53497		27.5492	±	5.20344
16:00:00	1427.44	±	144.232		843.315	±	35.7414		790.568	±	107.604		800.828	±	103.645
18:00:00	340.362	±	37.6704		459.505	±	22.5297		431.99	±	60.2944		402.27	±	51.8365
Total saturated	2277.16	±	224.087		1362.12	±	55.8877		1285.66	±	174.998		1276.1	±	165.079
16:1n-7	477.994	±	42.0726		41.372	±	1.19116		30.3824	±	6.7528		26.3914	±	5.59378
18:1n-9	2101.08	±	198.864		1869.29	±	85.8292		1747.69	±	211.208		1833.31	±	233.922
18:1n-7	291.928	±	20.0539		81.6577	±	2.84381		70.7078	±	8.16563		62.9364	±	5.74101
20:1n-9	576.235	±	48.3567		44.6956	±	2.78605		45.2786	±	7.73781		50.3477	±	9.10468
22:1n-11	666.882	±	53.4525		0	±	0		0	±	0		0	±	0
Total monoenes	4342.56	±	365.348		2071.65	±	85.9283		1928.35	±	235.477		2004.08	±	256.946
18:2n-6	696.091	±	46.5879		1347.41	±	62.3465		1842.26	±	182.238		2433.54	±	274.478
18:3n-6	17.8462	±	1.45705		76.6656	±	7.64061		130.545	±	10.5082		245.858	±	16.9567
20:2n-6	60.4969	±	2.34428		57.5696	±	4.73453		86.8184	±	10.3539		120.816	±	19.5814
20:3n-6	23.1321	±	0.681952		74.1708	±	2.36411		123.978	±	16.2885		205.52	±	25.6238
20:4n-6	44.0388	±	1.39895		21.4012	±	2.31378		46.4281	±	5.73031		107.908	±	10.2287
22:4n-6	2.33375	±	2.69493		0	±	0		2.64945	±	2.05871		7.85789	±	5.73555
22:5n-6	15.3366	±	0.424537		0	±	0		3.69254	±	2.56232		27.4503	±	2.89455
Total n-6 PUFA	859.276	±	51.1943		1577.22	±	67.0863		2236.37	±	221.95		3148.95	±	347.705
18:3n-3	189.132	±	13.4121		2207.98	±	104.357		1344.48	±	135.585		538.636	±	66.5765
18:4n-3	144.713	±	9.89115		703.935	±	47.5493		436.249	±	38.154		246.526	±	23.25
20:3n-3	18.4162	±	1.16209		106.058	±	10.4542		61.425	±	6.80487		21.1033	±	4.71915
20:4n-3	85.4318	±	4.43224		203.733	±	14.3378		119.665	±	15.1869		44.3104	±	6.79735
20:5n-3	351.454	±	12.4154		146.421	±	5.85009		90.4319	±	10.3631		41.3027	±	5.96779
21:5n-3	31.4213	±	1.75717		0	±	0		0	±	0		0	±	0
22:5n-3	150.261	±	3.6291		53.2217	±	5.27592		38.941	±	7.01917		19.7913	±	4.81801
22:6n-3	1132.59	±	41.5616		386.982	±	15.3166		308.137	±	38.819		219.616	±	32.1897
Total n-3 PUFA	2103.42	±	85.6511		3808.33	±	152.928		2399.33	±	246.439		1131.29	±	137.918
C16 PUFA	87.8809	±	5.5774		0	±	0		0	±	0		0	±	0
Total PUFA	3050.58	±	141.707		5385.55	±	218.986		4635.7	±	467.564		4280.24	±	483.169
